# Supplementary material for: A Novel Functional Splice Variant of AKT3 Defined by Analysis of Alternative Splice Expression in HPV-Positive Oropharyngeal Cancers
Source: Oxford University Press journal article supplement (doi:10.1158/0008-5472.can-16-3106), 2017-07-21
Supplement: 00085472can163106-sup-174584_2_supp_4098377_jrhqxm.xlsx [file 00085472can163106-sup-174584_2_supp_4098377_jrhqxm.xlsx]

## Sheet: ClinicalData
Supplemental Table 2. Summary of sample cohort clinical data in tumors and normal samples including age, gender, race, smoking history, TNM stage, recurrence, follow up time, survival and HPV status
TUMOR code (n=46)*	Age	Gender (M=1, F=0)	Race (1=White, 2=Black, 3=Asian, 4=other)	Smoking history (0=none, 1=current, 2=prior)	T stage	N stage	M stage	TNM stage	Recurrence (1=Y, 0=N)	Date of recurrence	Time to recurrence (months)	Time to last clinical follow up (months)	Overall Survival (1=Alive, 0=Died)	Survival (months)	PCR HPV status (0=HPV-, 1=HPV+, blank=not tested)	P16 Status (0=p16-, 1=p16+, X=unavail)	HPV ISH (0=HPV-, 1=HPV+, X=unavail)	Overall HPV (0=HPV-, 1=HPV+)
1	47	1	1	0	2	2A	0	4	0			46.1273	1			1	1	1
2	56	1	1	1	0	1	0	3	0			22.4066	1		1	1	1	1
3	55	1	1	0	2	1	0	3	0			11.4004	1			1	1	1
4	68	1	1	0	2	2B	0	4	0			24.0493	1			1	1	1
5	53	1	1	2	2	2A	0	4	0			39.655	1			1	1	1
6	54	0	1	1	1	2B	0	4	0			22.7023	1		1	1	1	1
7	64	0	1	0	2	2A	0	4	0			55.5236	1		1	1	1	1
9	55	1	1	1	1	2B	0	4	0			128.394	1			X	1	1
10	37	0	1	2	1	2B	0	4	0			8.1807	1			1	1	1
11	57	1	1	2	0	2A	0	4	0			79.3101	1		1	1	1	1
12	50	1	1	2	1	2A	0	4	0			65.0185	1		1	X	X	1
13	64	1	1	0	1	3	0	4	0			76.4846	1			1	1	1
14	48	1	1	0	2	2B	0	4	0			104.608	1			X	1	1
15	47	1	1	1	3	2A	0	4	0			35.2526	1		1	X	1	1
16	58	1	1	2	2	2B	0	4	0			74.809	1		1	X	1	1
17	64	1	1	1	2	1	0	3	1	2014-01-10	7.3922	21.8809	0	25.7577		1	1	1
18	40	1	1	2	3	2A	0	4	0			44.9446	1		1	1	1	1
19	52	1	1	2	2	2B	0	4	0			11.9918	1			1	1	1
20	55	1	1	1	3	2C	0	4	0			27.3347	1		1	X	X	1
21	44	1	1	2	1	2B	0	4	0			82.2012	1			1	1	1
22	49	1	1	0	2	3	0	4	0			28.8789	1		1	X	X	1
23	56	1	1	2	2	2A	0	4	0			18.9569	1		1	1	1	1
24	61	1	1	1	2	2C	0	4	0			56.8706	1			1	1	1
25	49	1	1	0	1	2A	0	4	0			44.7803	1		1	1	0	1
26	63	1	1	1	3	0	0	3	0			4.07392	0	4.33676		1	1	1
27	48	1	1	0	1	2B	0	4	0			0.427105	1			1	1	1
29	49	1	1	0	2	2B	0	4	0			9.42916	1		1	1	1	1
30	59	1	1	0	1	1	0	3	1	2013-08-30	2.52977	25.5277	1			1	1	1
31	47	1	1	0	1	2A	0	4	0			143.441	1			1	1	1
32	54	1	1	2	2	2B	0	4	0			59.6632	0	127.77	1	X	X	1
34	74	1	1	2	1	2B	0	4	0			31.2115	1			1	1	1
35	55	0	1	2	2	2B	0	4	0			28.0903	1			1	1	1
36	65	1	1	1	1	1	0	3	0			66.4969	1		1	1	1	1
37	65	1	1	2	2	2C	0	4	0			27.0719	1		1	1	0	1
38	54	1	1	1	3	2B	0	4	0			6.07803	0	7.12936	1	1	1	1
40	47	1	1	1	1	2B	0	4	0			12126.4	0	126.653		1	1	1
41	75	0	1	0	2	2C	0	4	1	2006-02-09	11.6961	11.6961	0	20.9281		1	1	1
42	56	1	1	2	3	1	0	3	0			39.9507	1			1	1	1
43	35	1	1	0	1	2B	0	4	0			43.7618	1			1	1	1
44	56	1	1	1	2	2B	0	4	0			23.2279	1			1	1	1
45	68	1	4	2	1	2A	0	4	0			5.38809	1			1	1	1
46	71	1	1	2	3	2C	0	4	0			1.77413	0	1.77413		1	1	1
47	67	1	3	0	3	2B	0	4	0			47.1129	0	49.117	1	1	1	1
48	56	1	1	2	4	2B	0	4	0			74.7105	0	76.386	1	X	X	1
49	55	1	1	0	1	2B	0	4	0			102.637	0	107.138	1	1	1	1
50	59	1	1	0	1	2A	0	4	0			25.1335	1			1	1	1
*tumors 8, 33, 39 did not pass RIN (RNA Integrity Number) quality thresholds; sample 28 was incomplete process within sequencing analysis
					44
	Age	Sex (male)		smoking		t stage	%	n stage		%	TMN
med	55	41	never	17	T1	17	36.9565	0	1	2.17391	1	0
min	35		current	12	T2	18	39.1304	1	6	13.0435	2	0
max	75	Race (% white)	former	17	T3	8	17.3913	2A	12	26.087	3	7	15.2174
		0.956522			T4	1	2.17391	2B	20	43.4783	4	39	84.7826
					T0	2	4.34783	2C	5	10.8696
								3	2	4.34783
NORMALS (n=25)	Age	Gender (M=1, F=0)	Race (1=White, 2=Black, 3=Asian, 4=other)	Smoking history (0=none, 1=current, 2=prior)
101	18	0	2	0
102	30	0	1	1
103	25	0	1	0
104	20	0	2	0
105	27	0	2	0
106	30	1	1	0
107	33	0	2	0
108	21	1	1	0
109	20	1	2	0
110	30	0	1	0
111	47	1	1	1
112	20	0	1	0
113	51	0	1	1
114	21	0	2	1
115	39	0	1	2
116	19	0	1	0
117	23	1	1	0
118	41	0	2	0
119	22	1	1	0	0.76
120	30	1	4	2	0.16
121	40	1	4	0	0.08
122	18	1	2	0
123	27	0	1	0
124	41	1	1	0
125	41	0	2	0
	27	10	0.56	19
	18		14	4
	51			2
